# Supplementary material for: Coronavirus and Post-COVID-19 Syndrome: A Systematic Review
Source: medRxiv preprint, doi:10.1101/2023.09.24.23296022, version 1 (2023-09-25)
Supplement: Supplementary Materials [file 296022_file02.docx]

**Supplementary Materials**


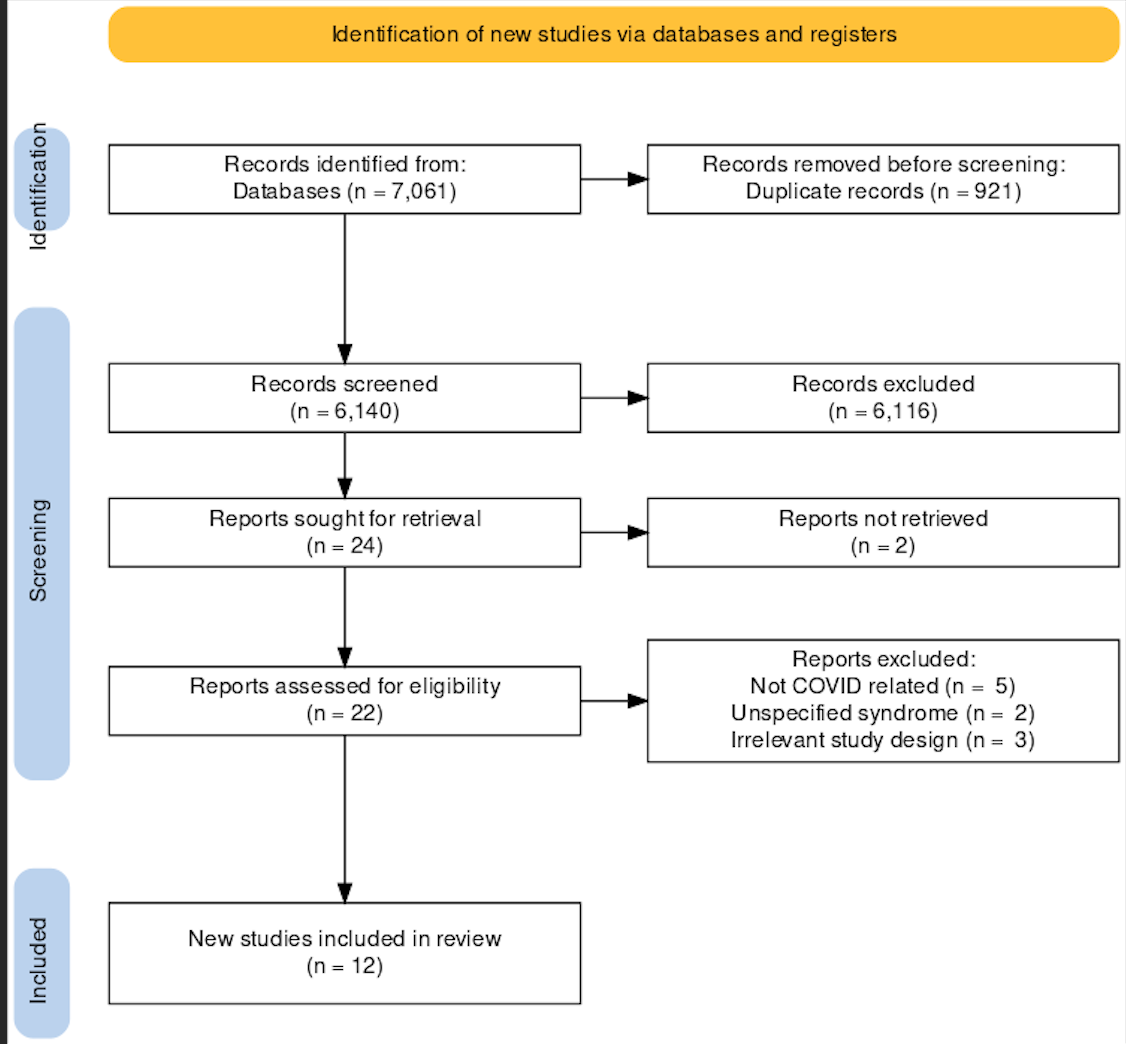


**Figure S1.** PRISMA flowchartoutlining the paper screening process.

**
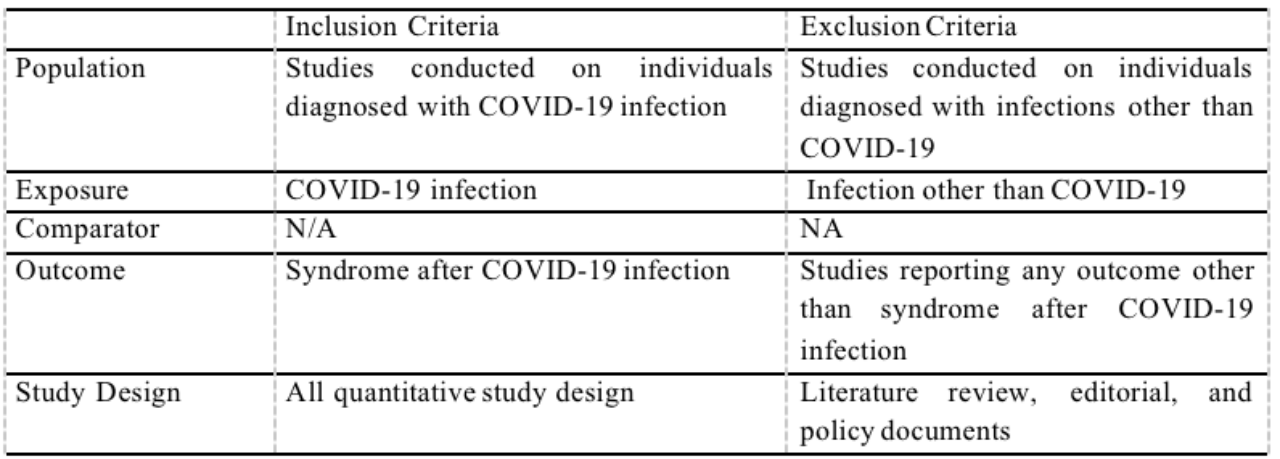
Table S1.** Inclusion and Exclusion Criteria based on Population, Exposure, Comparator, and Outcome of Review Question.

**
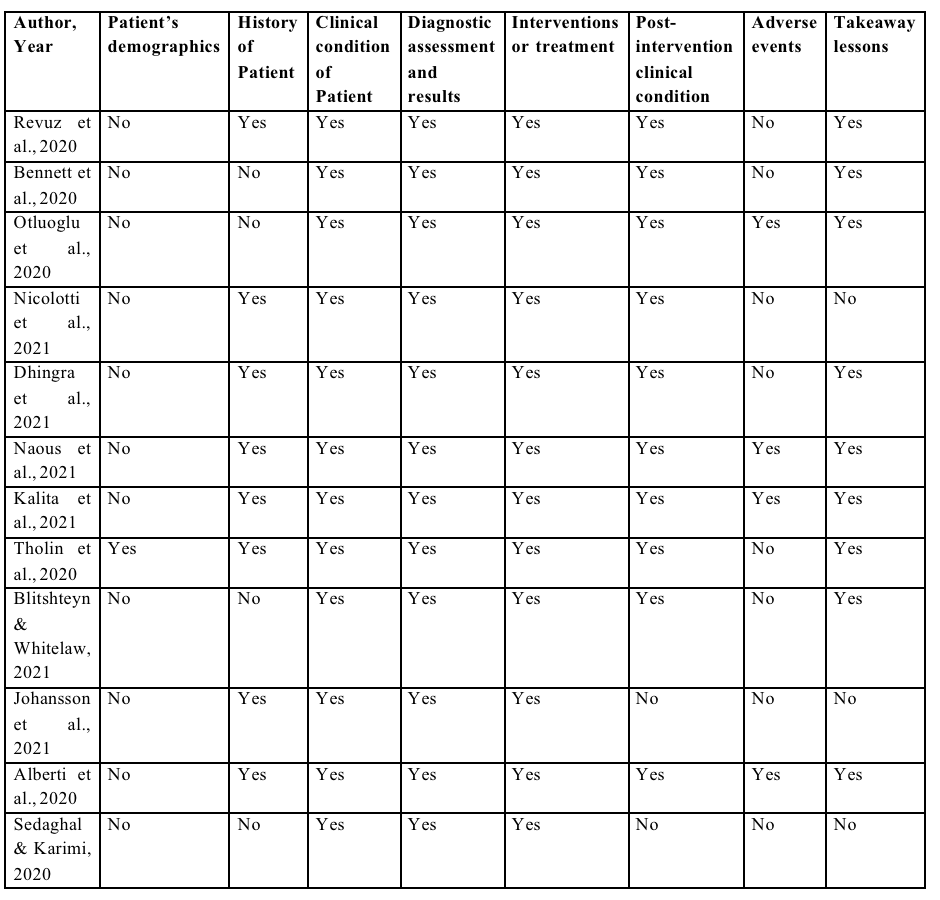
Table S2.** Risk of Bias Assessment of included studies.
